# Supplementary material for: sp2–sp3 Hybrid Porous Carbon Materials Applied for Supercapacitors
Source: MDPI journal article supplement (doi:10.3390/en14195990), 2021-09-22
Supplement: s1 [file s1]

# **sp<sup>2</sup>–sp<sup>3</sup> Hybrid Porous Carbon Materials Applied for Supercapacitors**

Ji Su Chae <sup>1</sup>, Won-seop Kang <sup>2</sup> and Kwang Chul Roh <sup>1,\*</sup>

<sup>1</sup> Energy & Environmental Division, Korea Institute of Ceramic Engineering & Technology,

Jinju-si, 52851, Korea; jschae0@kicet.re.kr

<sup>2</sup> Vina Tech Co. Ltd., Jeonju-si 54853, Jeollabuk-do, Korea; wskang@vina.co.kr

\* Correspondence: rkc@kicet.re.kr; Tel.: +82-55-792-2625

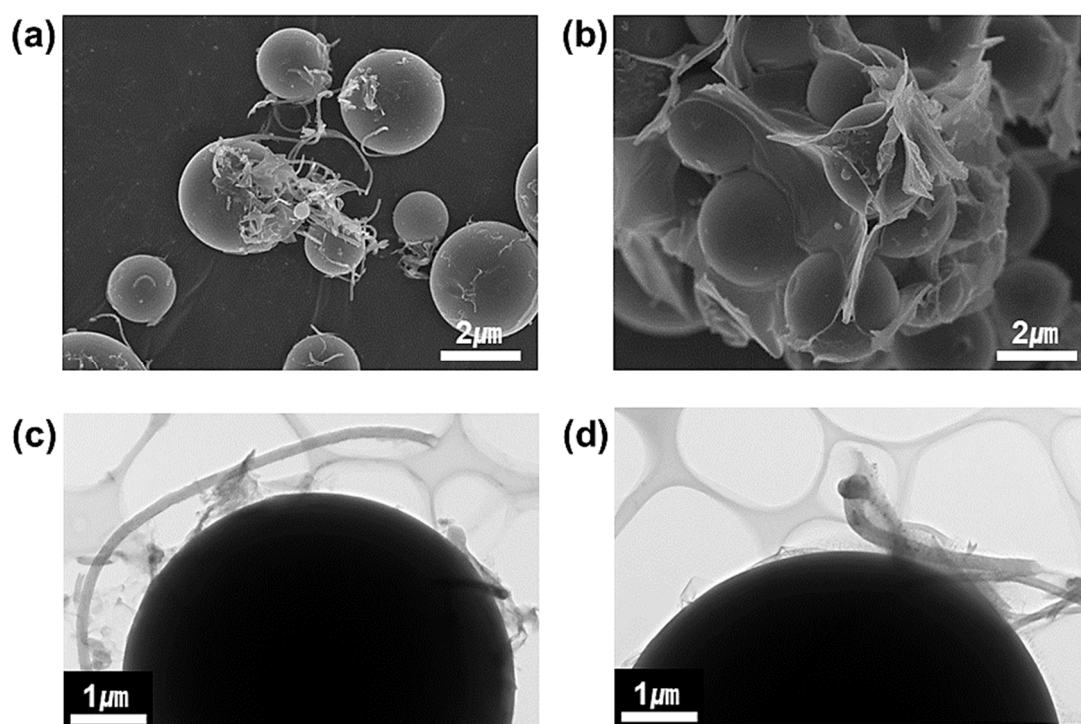

**Figure S1** FE-SEM images of as-prepared (a) HPC-1/2 and (b) HPC-1/6; HR-TEM images of as-prepared (c) HPC-1/2 and (d) HPC-1/6.

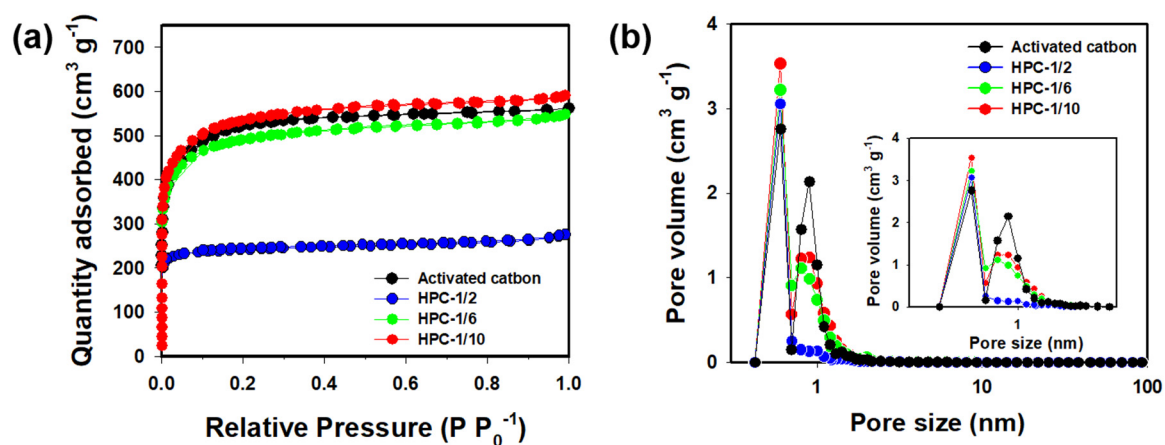

**Figure S2** BET characterization of different samples: (a) N<sub>2</sub> adsorption isotherms and (b) pore size distribution (PSD) of activated carbon and HPC samples for different KOH concentrations (1:2, 1:6, 1:10).

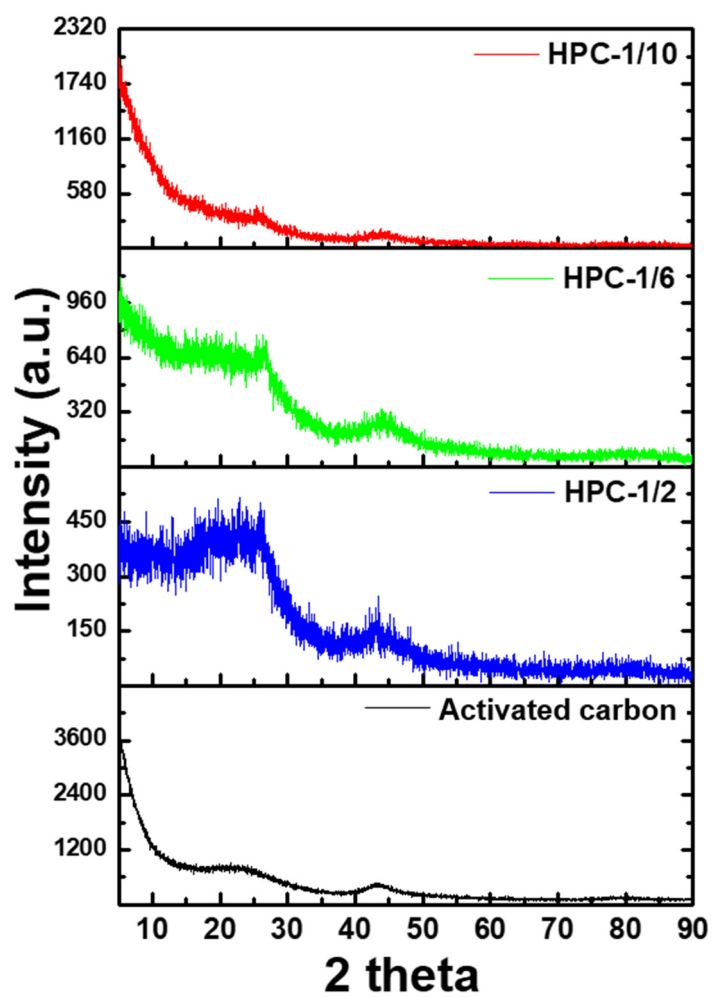

**Figure S3** XRD pattern of samples.

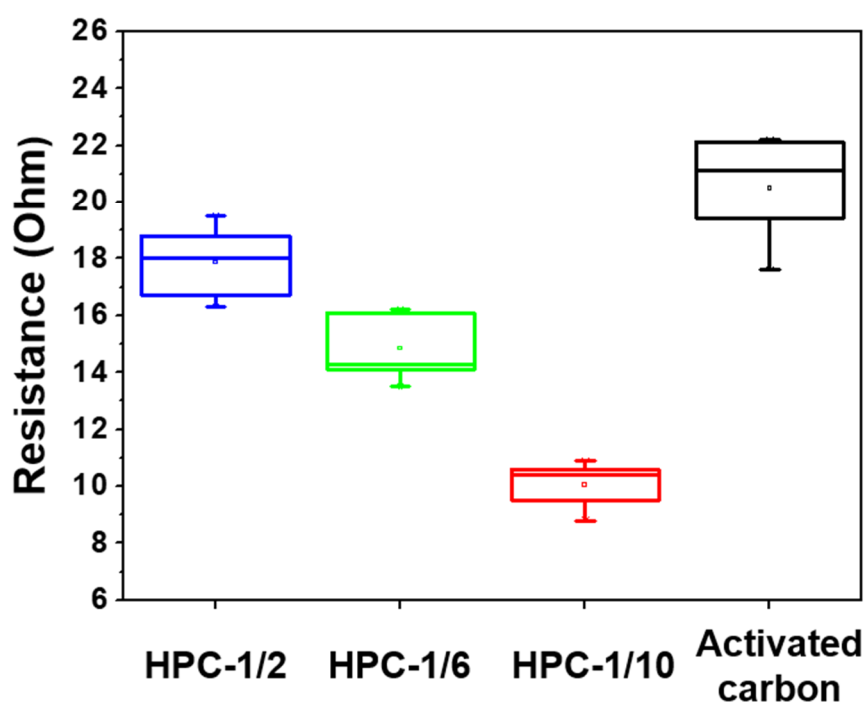

**Figure S4** Equivalent series resistance (ESR) of cells assembled with each sample.

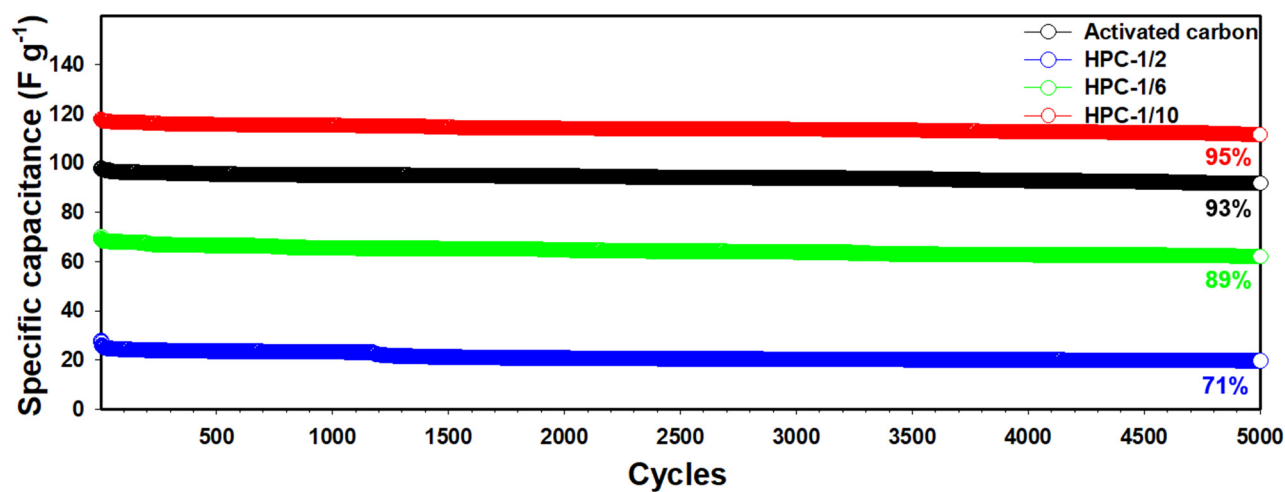

**Figure S5** Cycle stability for samples at  $5 \text{ mA} \cdot \text{cm}^{-2}$  and 1–2.7 V.

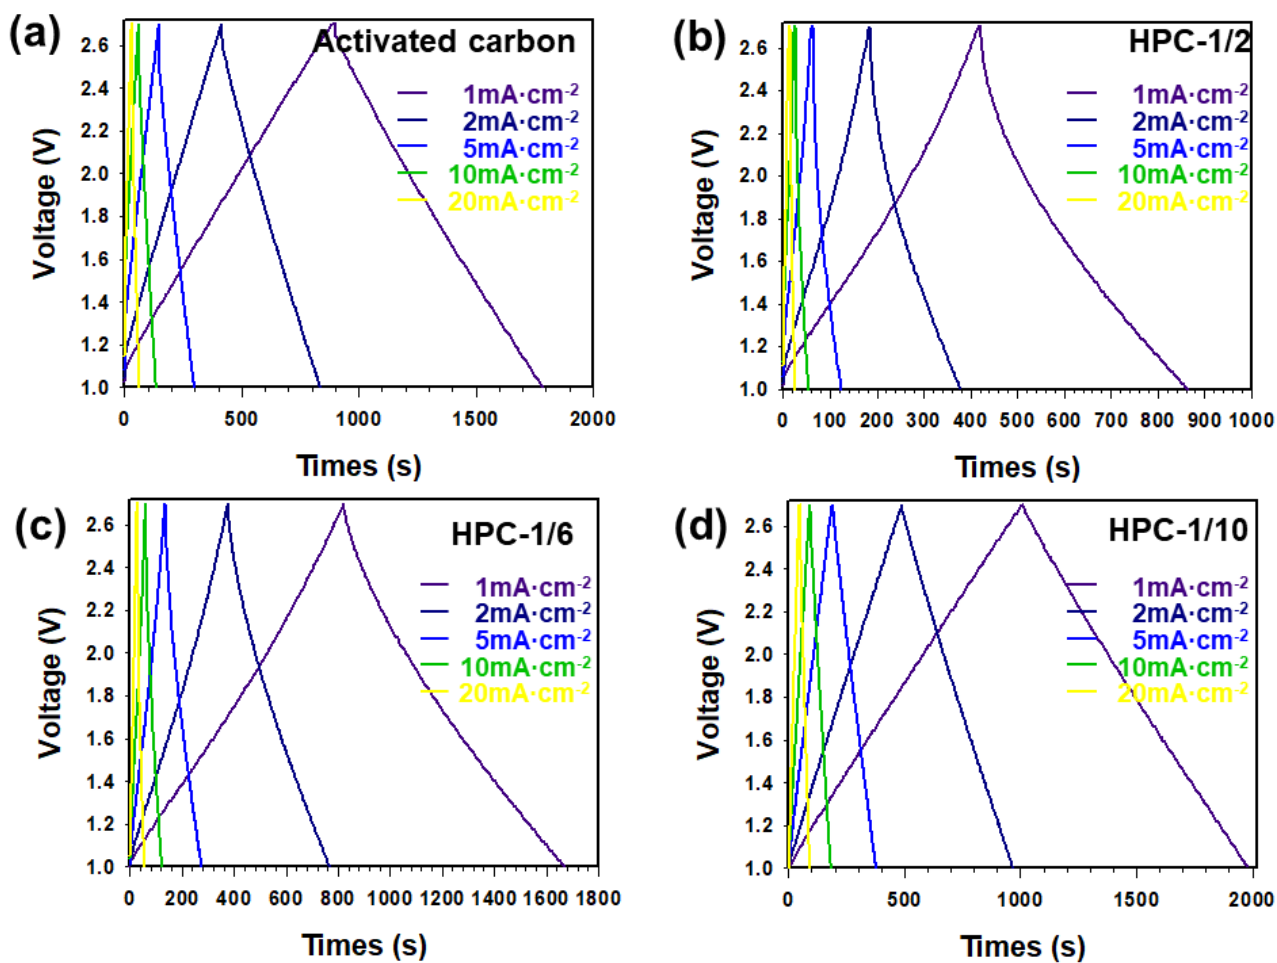

**Figure S6** Charge-discharge profiles for samples between 1-2.7V at various current density

**Table S1** Surface contents in samples and curve fitting results of the XPS C1s spectra

| Samples          | Components(%) |      | C=C (sp <sup>2</sup> ) |        | C-C (sp <sup>3</sup> ) |        | C-OH      |        | C-O-C     |        | C=O       |        | O-C=O     |        | $\pi$ - $\pi$ |        |
|------------------|---------------|------|------------------------|--------|------------------------|--------|-----------|--------|-----------|--------|-----------|--------|-----------|--------|---------------|--------|
|                  | C             | O    | B.E. (eV)              | C. (%) | B.E. (eV)              | C. (%) | B.E. (eV) | C. (%) | B.E. (eV) | C. (%) | B.E. (eV) | C. (%) | B.E. (eV) | C. (%) | B.E. (eV)     | C. (%) |
| Activated carbon | 92.8          | 7.2  | 284.4                  | 41.1   | 284.8                  | 16.2   | 285.4     | 10.8   | 286.2     | 10.6   | 287.4     | 8.6    | 288.7     | 7.1    | 289.9         | 5.6    |
| HPC-1/2          | 88.4          | 11.6 | 284.4                  | 49.9   | 284.9                  | 17.5   | 285.7     | 11.3   | 286.5     | 7.4    | 287.7     | 6.7    | 288.9     | 4.8    | 290.1         | 2.4    |
| HPC-1/6          | 91.0          | 9.0  | 284.4                  | 45.5   | 284.8                  | 17.7   | 285.4     | 12.5   | 286.4     | 9.7    | 287.5     | 5.3    | 288.6     | 5.7    | 290.0         | 3.6    |
| HPC-1/10         | 95.1          | 4.9  | 284.4                  | 44.0   | 284.8                  | 18.4   | 285.4     | 12.3   | 286.2     | 10.0   | 287.5     | 6.3    | 288.8     | 5.8    | 290.1         | 3.2    |

**Table S2** Electrode density of samples

| Sample                                 | Activated carbon | HPC-1/2 | HPC-1/6 | HPC-1/10 |
|----------------------------------------|------------------|---------|---------|----------|
| Electrode density (g/cm <sup>3</sup> ) | 0.55             | 0.82    | 0.70    | 0.51     |
